# Supplementary material for: Defect and interface/surface engineering synergistically modulated electron transfer and nonlinear absorption properties in MoX2 (X = Se, S, Te)@ZnO heterojunction
Source: Royal Society of Chemistry journal article supplement (doi:10.1039/d3nr05766f), 2023-12-15
Supplement: d3nr05766f1.pdf [file d3nr05766f1.pdf]

## Supporting Information

### Defects and interfacial/surface synergistically Modulated electron transfer and nonlinear absorption properties in MoX<sub>2</sub> (X=Se, S, Te) @ZnO Heterojunction

Yu Liu<sup>1</sup>, Cheng-Bao Yao<sup>1,\*</sup>, Hong-Yu Li<sup>1</sup>, Hong-Xu Cao<sup>1</sup>, Xin-Yu Zheng<sup>1</sup>, Bing-Yin Shi<sup>1</sup>, and Hai-Tao Yin<sup>1,\*</sup>

<sup>1</sup>Key Laboratory of Photonic and electric Bandgap materials, Ministry of Education, School of Physics and Electronic Engineering, Harbin Normal University, Harbin, 150025, Heilongjiang Province, China

\*Corresponding author: yaochengbao5@163.com, wlyht@126.com

#### 1. Experimental parameters of sample preparation

**1.1 MoX<sub>2</sub> nanoflowers:** By controlling the time and temperature of hydrothermal reaction, we obtained MoX<sub>2</sub> nanoflower materials. Three kinds of MoSe<sub>2</sub> were obtained at 12 h by setting the preset temperature at 180 °C, 220 °C and 260 °C, respectively. At 220 °C, two MoSe<sub>2</sub> materials were obtained by changing the reaction time, in which the reaction time was 12 h and 24 h respectively. MoS<sub>2</sub> was prepared under reaction conditions of 24 h and 200 °C. At 200 °C, MoTe<sub>2</sub> was obtained by setting the reaction time to 24 h and 48 h respectively.

**1.2 MoX<sub>2</sub>@ZnO composite materials:** MoSe<sub>2</sub>@ZnO composite was obtained at 60W and 0.5h, and sputtering time was set at 100 °C, 200 °C and 300 °C, respectively, in which MoSe<sub>2</sub> was prepared at 200°C and 24h. Under the conditions of 1 h and 150 °C, MoS<sub>2</sub>@ZnO composite material was obtained by changing the sputtering power, in which the power was 50 W, 100 W and 150 W, respectively. MoTe<sub>2</sub> obtained at 200 °C and 24 h was used as the base. MoTe<sub>2</sub>@ZnO composite was prepared at 60 W and 150 °C with sputtering time of 0.5 h, 1 h and 1.5 h, respectively.

In this paper, MoSe<sub>2</sub> obtained at 220 °C, 24 h and MoSe<sub>2</sub>@ZnO prepared at 100 °C were selected as the research objects. The MoS<sub>2</sub> obtained at 200 °C, 24 h and MoS<sub>2</sub>@ZnO prepared at 100 W sputtering power were studied. The MoTe<sub>2</sub> prepared at 200 °C, 24 h and MoTe<sub>2</sub>@ZnO prepared at 1 h sputtering time were analyzed.

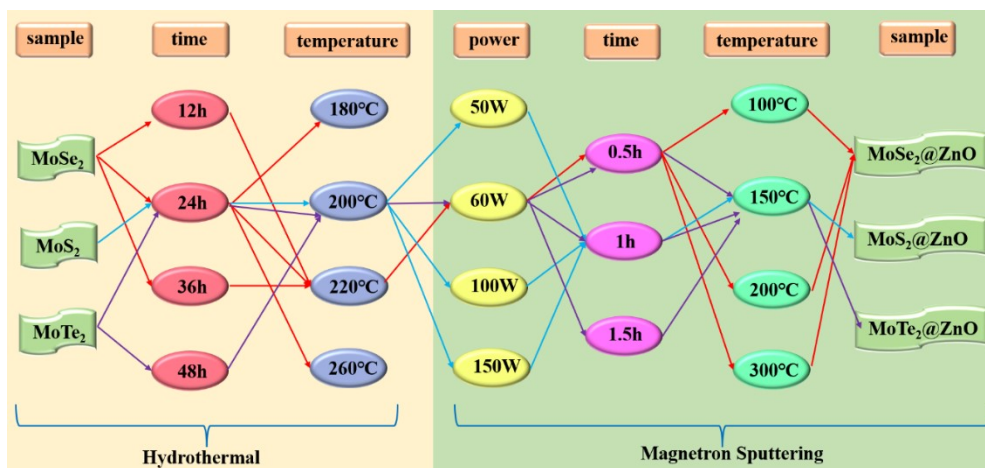

Fig. S1 Experimental parameters of  $\text{MoX}_2$  and  $\text{MoX}_2@ZnO$ .

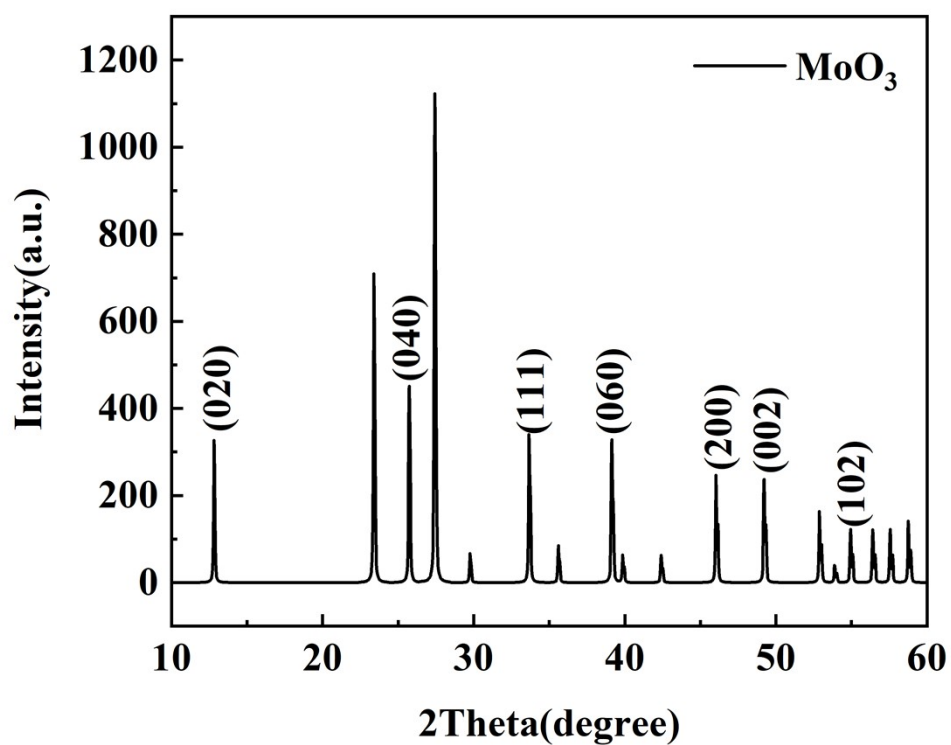

Fig. S2 XRD pattern of  $\text{MoO}_3$  (JCPDS card number 1-706).

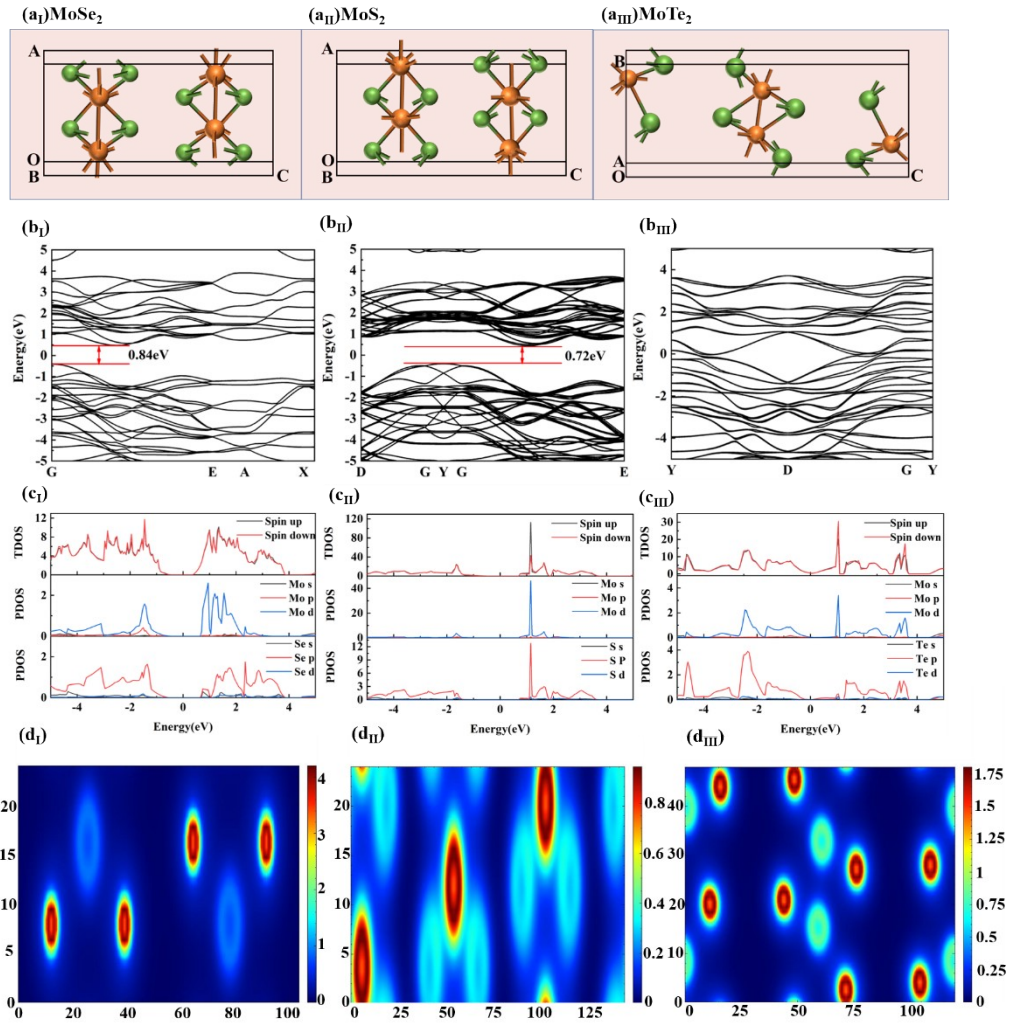

**Fig. S3** (a) Original cell model of the electronic structure of  $\text{MoX}_2$ , (b) energy band, (c) density of state and (d) charge density.

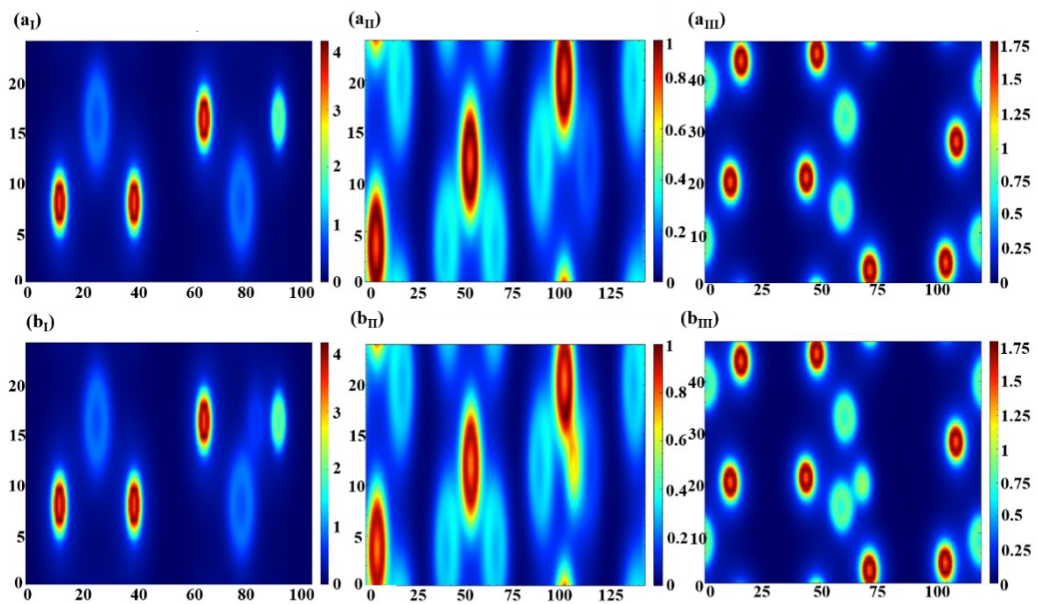

**Fig. S4** (a) The charge density of the electronic structure of  $\text{MoX}_2$  with chalcogenide vacancy defects.

(b) The charge density of the O atom entering the electronic structure of the  $\text{MoX}_2$  lattice.
